# Supplementary material for: Donor Utilization in the Recent Era: Effect of Sex, Drugs, and Increased Risk
Source: PubMed Central journal article supplement — Circ Heart Fail. 2022 Jun 21;15(7):e009547. doi: 10.1161/CIRCHEARTFAILURE.122.009547 (PMC9287105; doi:10.1161/circheartfailure.122.009547), 2022-06-21
Supplement: hhf-15-e009547-s001.pdf [file hhf-15-e009547-s001.pdf]

**SUPPLEMENTAL MATERIAL**

The data for this study was obtained from the United Network for Organ Sharing ([www.unos.org](http://www.unos.org)). The data included freetext fields which could contain protected health information. For this reason, a data use agreement was necessary along with an Institutional Review Board Approval. On this basis, the authors cannot share the data but it can be requested from the United Network for Organ Sharing directly.

**Table S1: UNOS Toxicology Fields**

| <b>UNOS Field Name</b>     | <b>Number (%) of Donors Positive</b> | <b>Number (%) of Donors Negative</b> | <b>Number (%) of Donors Unknown</b> | <b>Number of Donors with NO Data</b> | <b>Meaning of Field</b>                             |
|----------------------------|--------------------------------------|--------------------------------------|-------------------------------------|--------------------------------------|-----------------------------------------------------|
| <b>Current UNOS Fields</b> |                                      |                                      |                                     |                                      | <b>Collected since 6/30/2004</b>                    |
| ALCOHOL_HEAVY_DON          | 3743 (15.8 %)                        | 19574 (82.4%)                        | 421 (1.7%)                          | 10 (0.01 %)                          | Heavy Alcohol Use (heavy=2+ drinks/day)             |
| CONTIN_COCAINE_DON         | 1835 (7.7 %)                         | 1640 (6.9 %)                         | 574 (2.4 %)                         | 19699 (83%)                          | History of cocaine use+ recent 6-month use          |
| CONTIN_OTH_DRUG_DON        | 7447 (31.4 %)                        | 2363 (10 %)                          | 1167 (4.9 %)                        | 12771 (53.7 %)                       | History of other drugs in past + recent 6-month use |
| HIST_COCAINE_DON           | 4049 (17%)                           | 19254 (81 %)                         | 417 (1. %)                          | 28 (0.1%)                            | History of cocaine use in past                      |
| HIST_OTH_DRUG_DON          | 10976 (46.2 %)                       | 12485 (52.6 %)                       | 259 (1.1 %)                         | 28 (0.12 %)                          | History of other drug use in past                   |
